# Supplementary material
Source: MDPI journal article supplement (https://www.mdpi.com/2504-477X/6/6/174)
Supplement: s1 [file s1]

# **Supporting Information**

## **Conductive oxide for formulating mitigated-sensitivity energetic composite materials**

Pierre GIBOT<sup>1</sup>, Estelle PUEL<sup>2</sup>, B. LALLEMAND<sup>1</sup>, F. OUDOT<sup>1</sup>

1. NS3E laboratory, UMR 3208 ISL/CNRS/UNISTRA, French-German Research Institute of Saint-Louis (ISL), 5 rue du Général Cassagnou, BP70034, 68301 Saint Louis, France
2. Faculty of Science and Engineering, University of Toulouse III Paul Sabatier, 118 Route de Narbonne - 31062 Toulouse, France

**Video S1. Combustion videos in unconfined configuration of the (a) Al/ITO\_μm, (b) Al/ITO\_nm energetic systems, respectively. Equivalence ratio of 1.2.**

**Video S2. Combustion videos in confined configuration of the Al/ITO\_nm energetic system (equivalence ratio of 1.2).**
